# Supplementary material
Source: PubMed Central journal article supplement (PMC1421360)
Supplement: JCI0627203sd.pdf [file JCI0627203sd.pdf]

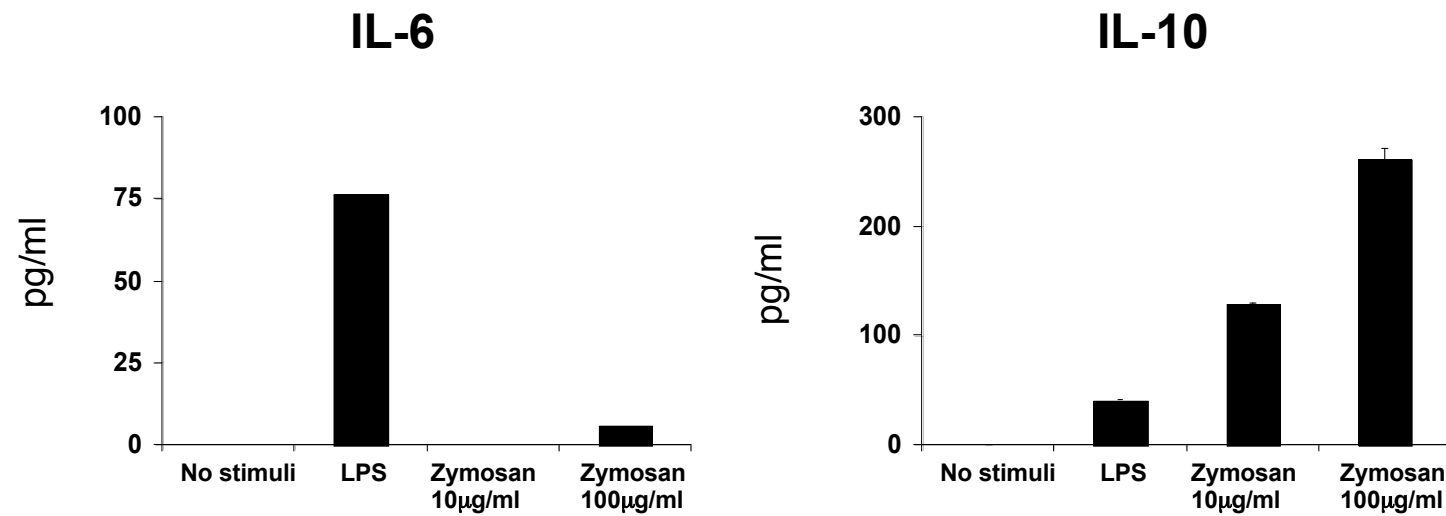

Similar cytokine profiles are observed in the absence of CD40L ligation, however IL-12(p70) is undetectable.

**Supplementary  
Figure 1**

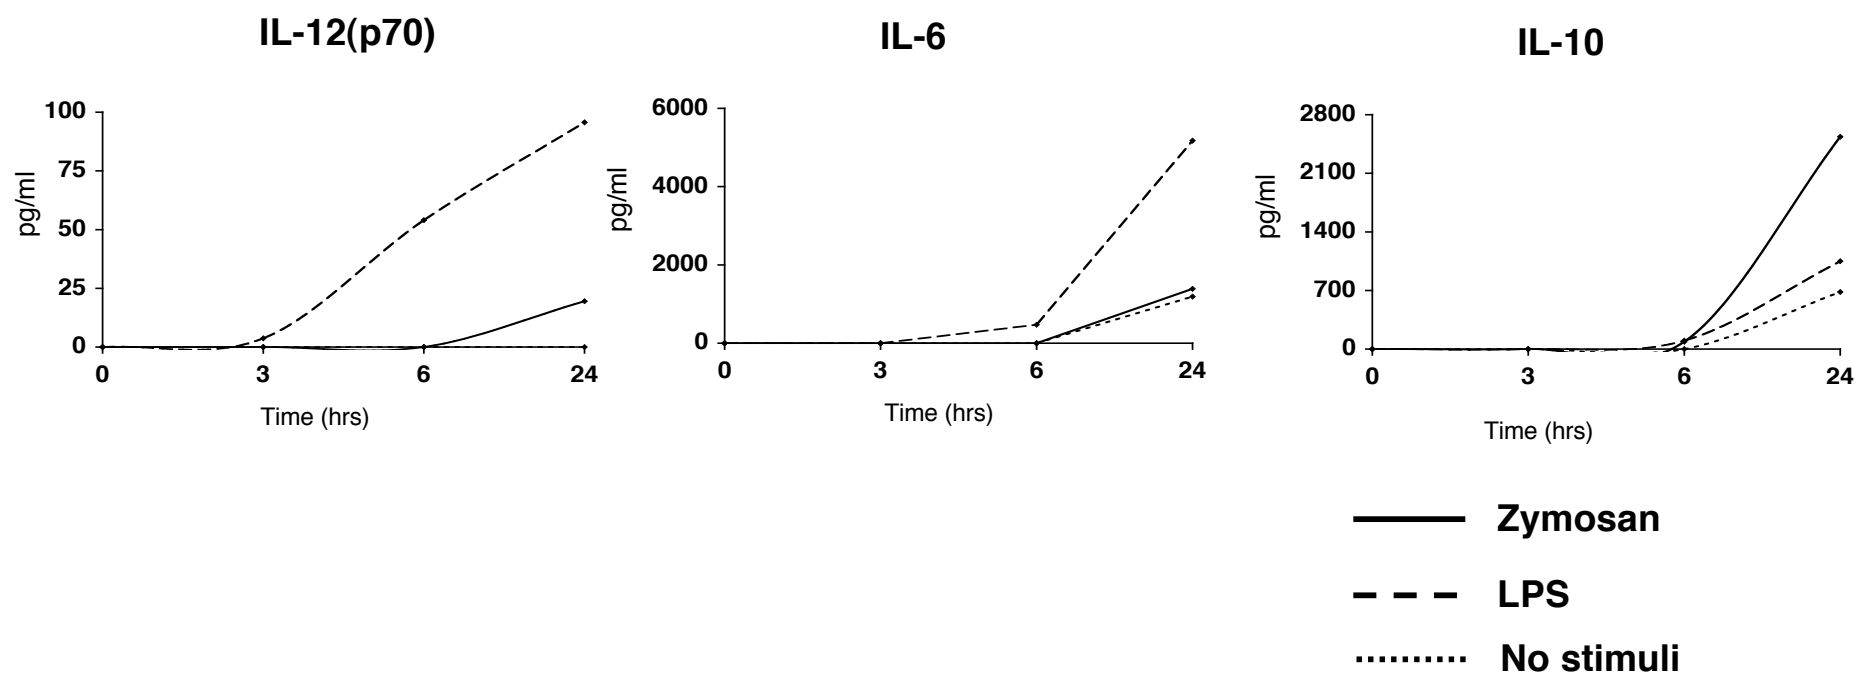

**Supplementary  
Figure 2**

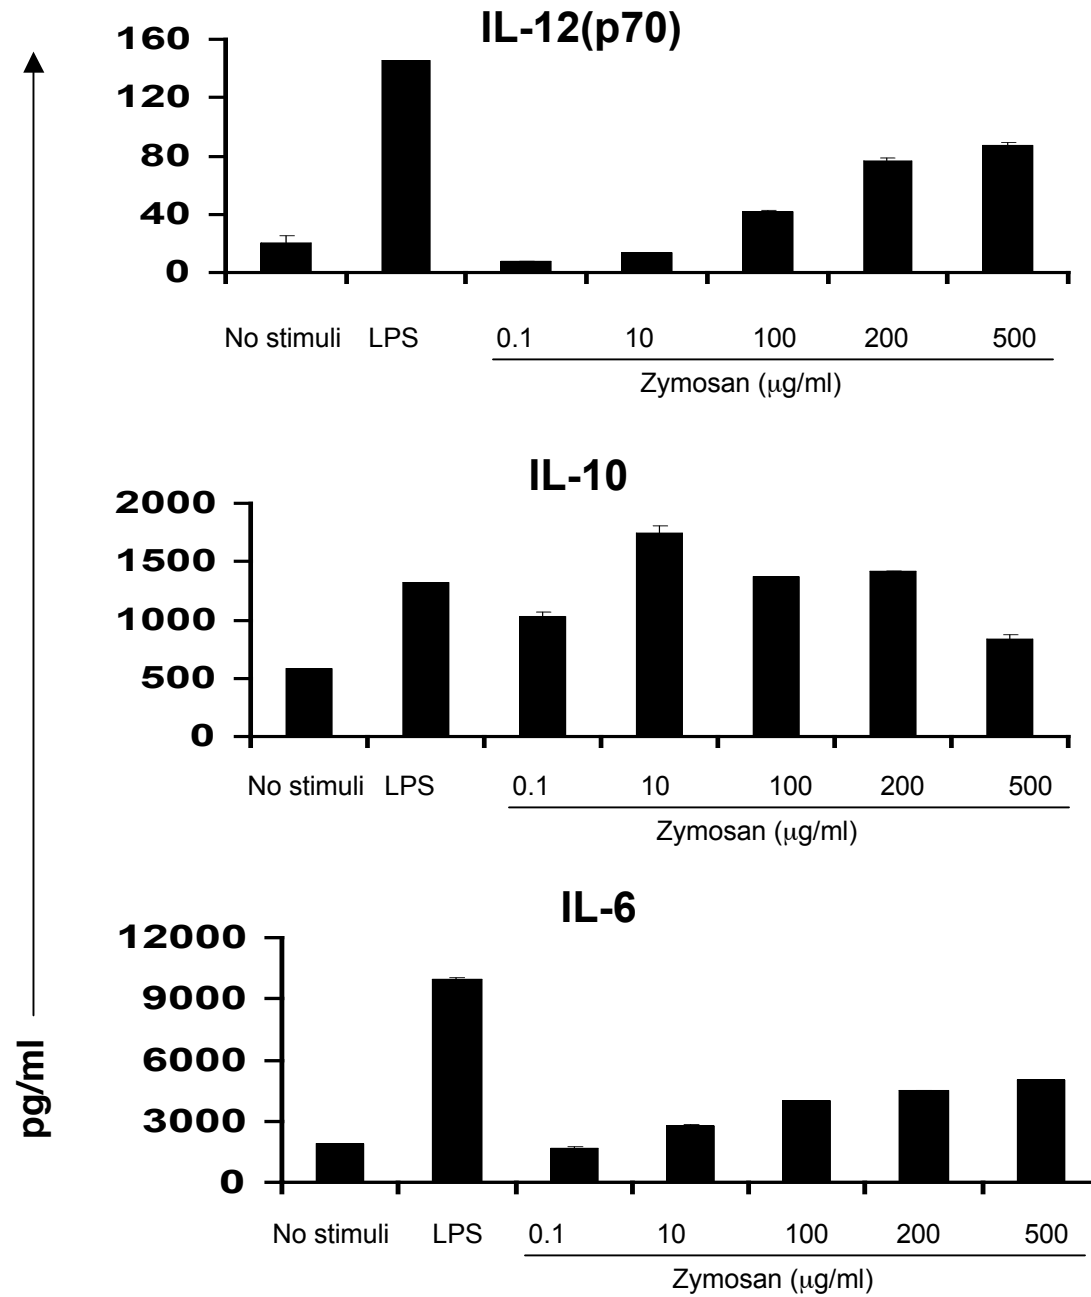

**Supplementary Figure 3**

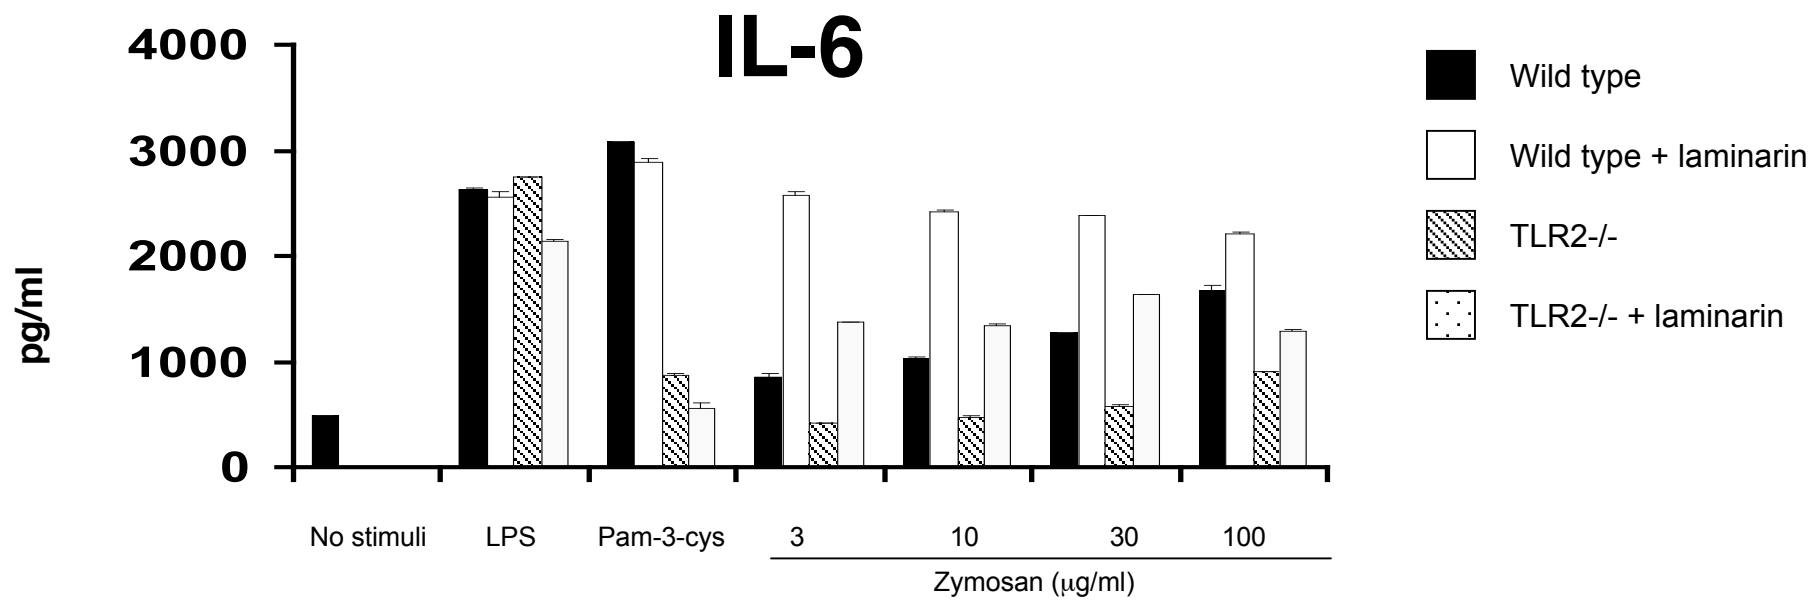

**Supplementary Figure 4**

**Supplementary Figure 1: Induction of distinct dendritic cell cytokine profiles by LPS versus zymosan is not dependent on CD40-L costimulation.** Murine, splenic CD11c<sup>+</sup> dendritic cells were isolated by flow cytometry, and cultured in vitro with *E.coli* LPS or zymosan for 24–48 hrs, in the absence of a CD40-L expressing cell line. Cytokines were analyzed by ELISA. Representative of 2 experiments.

**Supplementary Figure 2: Kinetics of cytokine induction in dendritic cells by LPS versus zymosan.** Murine, splenic CD11c<sup>+</sup> dendritic cells were isolated by flow cytometry, and cultured in vitro with *E.coli* LPS or zymosan for various times, in the presence of a CD40-L expressing cell line. Cytokines were analyzed by ELISA. Representative of 2 experiments.

**Supplementary Figure 3: Effect of zymosan dose on the induction of cytokines.** Murine, splenic CD11c<sup>+</sup> dendritic cells were isolated by flow cytometry, and cultured in vitro with *E.coli* LPS or zymosan, at various doses, in the presence of a CD40-L expressing cell line. Cytokines were analyzed by ELISA. Representative of 2 experiments.

**Supplementary Figure 4: The roles played by dectin-1 and TLR2 on the induction of IL-6 in dendritic cells by zymosan.** Murine, splenic CD11c<sup>+</sup> dendritic cells from wild type or TLR2 knockout mice were isolated by flow cytometry, and cultured in vitro with *E.coli* LPS or zymosan, at various doses, in the presence of a CD40-L expressing cell line. Laminarin was added to block signaling via dectin-1. Cytokines were analyzed by ELISA. Representative of 2 experiments.
